# Supplementary material
Source: MDPI journal article supplement (https://www.mdpi.com/2072-4292/14/8/1828)
Supplement: s1 [file s1]

*Supplemental Information*

# **Classification and Identification of Spectral Pixels with Low Maritime Occupancy Using Unsupervised Machine Learning**

*Dongmin Seo<sup>1</sup>, Sangwoo Oh<sup>1,\*</sup>, and Daekyoem Lee<sup>2</sup>*

<sup>1</sup> Maritime Safety and Environmental Research Division, Korea Research Institute of Ships and Ocean Engineering, Yuseong-daero 1312beon-gil, Yuseong-gu, Daejeon 34103, Republic of Korea

<sup>2</sup> SEASON Co. LTD, Sejong City 20128, Republic of Korea

† Correspondence to:

(S. Oh) E-mail; swoh@kriso.re.kr, Tel; +82-42-866-3615, Fax; +82-42-866-3624, Address; Yuseong-daero 1312beon-gil, Yuseong-gu, Daejeon 34103, Republic of Korea

Color[1] = brown

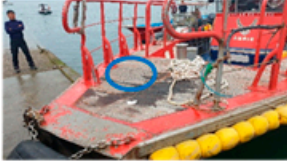

Color[2] = blue

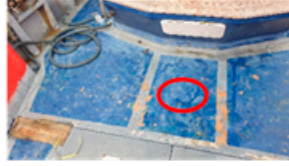

Color[3] = red

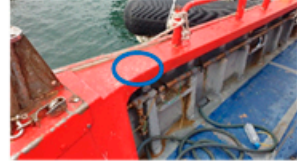

Color[4] = gray

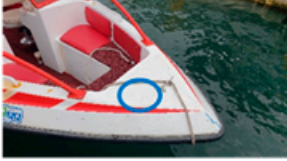

Color[5] = red

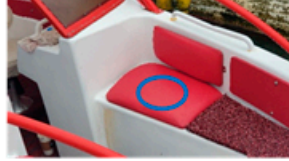

Color[6] = blue

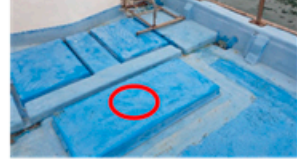

Color[7] = gray

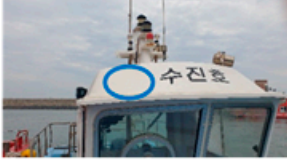

Color[8] = gray

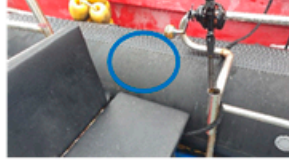

Color[9] = blue

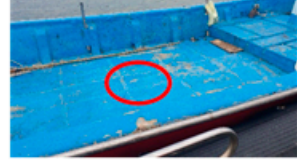

Color[10] = brown

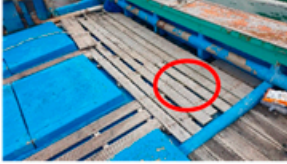

Color[11] = blue

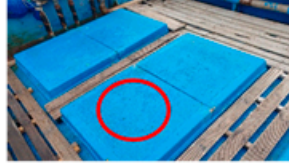

Color[12] = gray

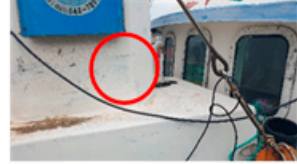

Color[13] = orange

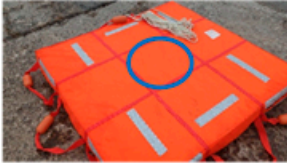

Color[14] = orange

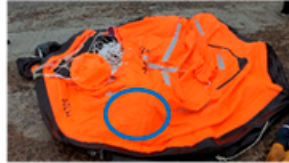

Color[15] = blue

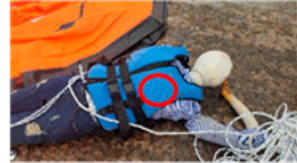

Color[16] = orange

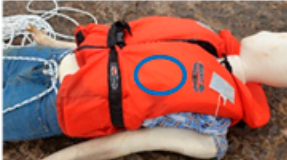

Color[17] = gray

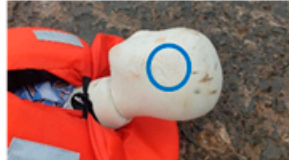

Color[18] = white

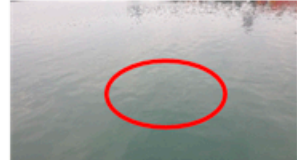

**Figure S1.** Reference image for DBSCAN reference mapping. The circle marked on each image were measured with a field.

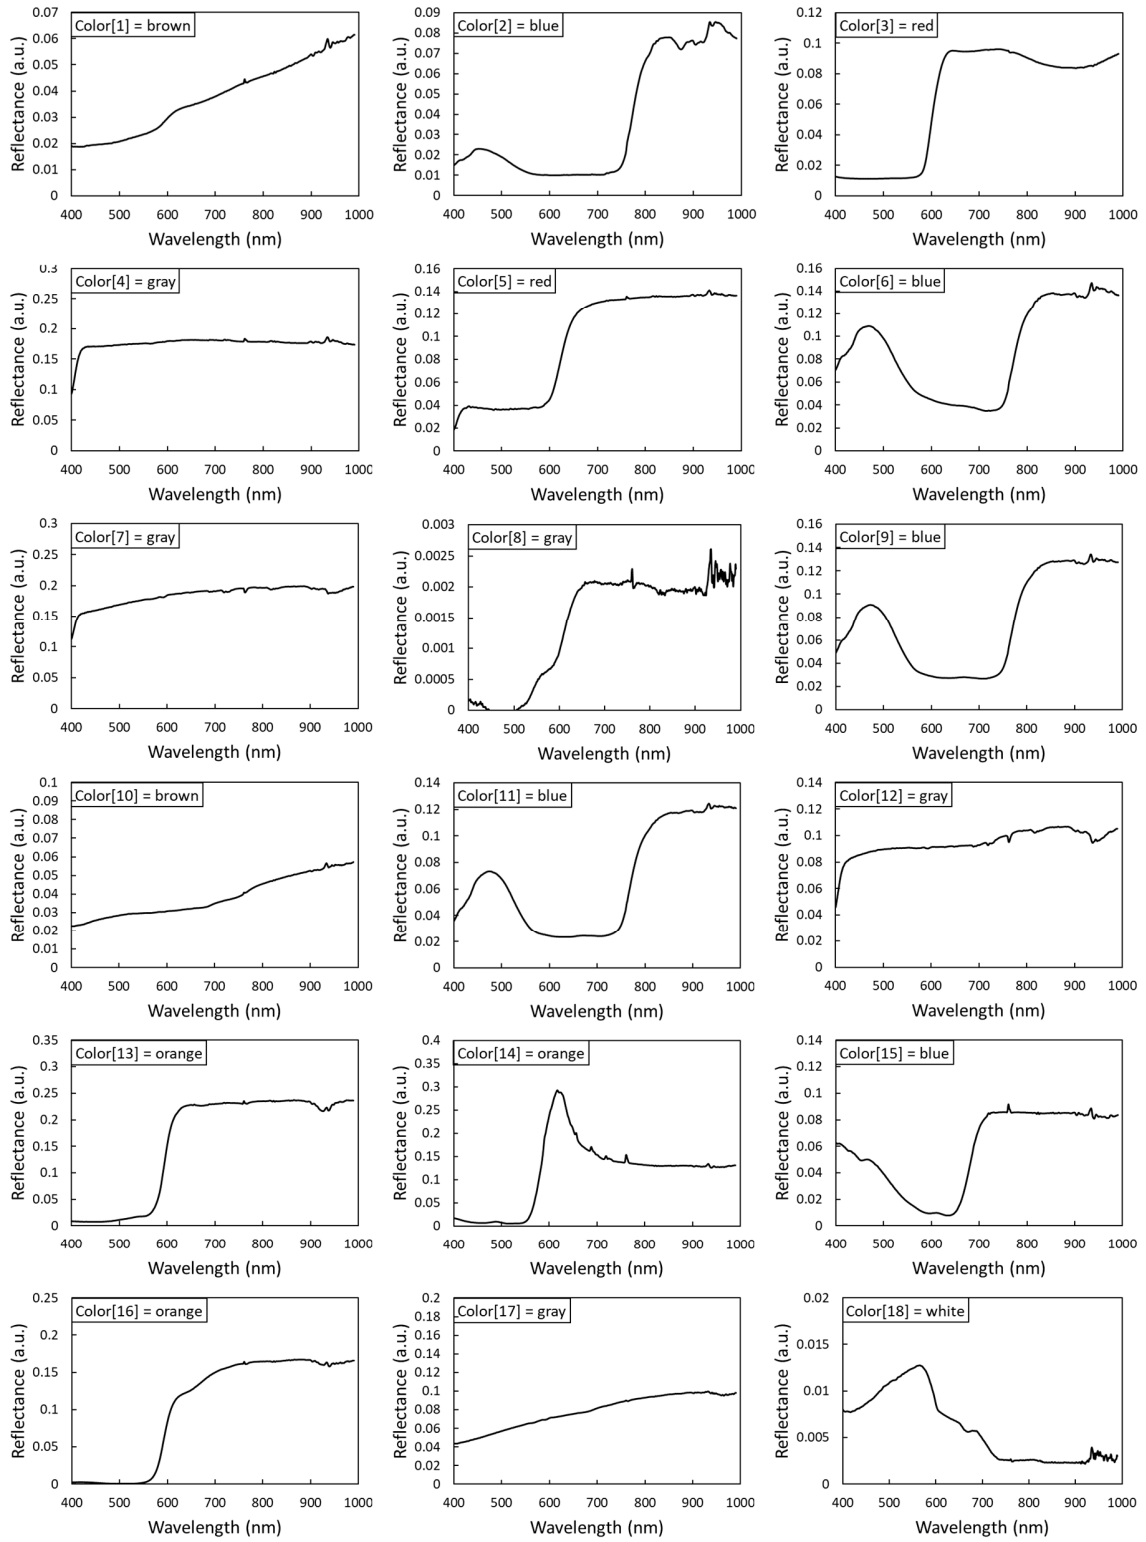

Figure S2. Spectral data for DBSCAN reference mapping.
